# Supplementary material
Source: PubMed Central journal article supplement (PMC5866918)
Supplement: NIHMS75534-supplement-Supplementary_figure_2.pdf [file NIHMS75534-supplement-Supplementary_figure_2.pdf]

(A): Total Hip Replacement

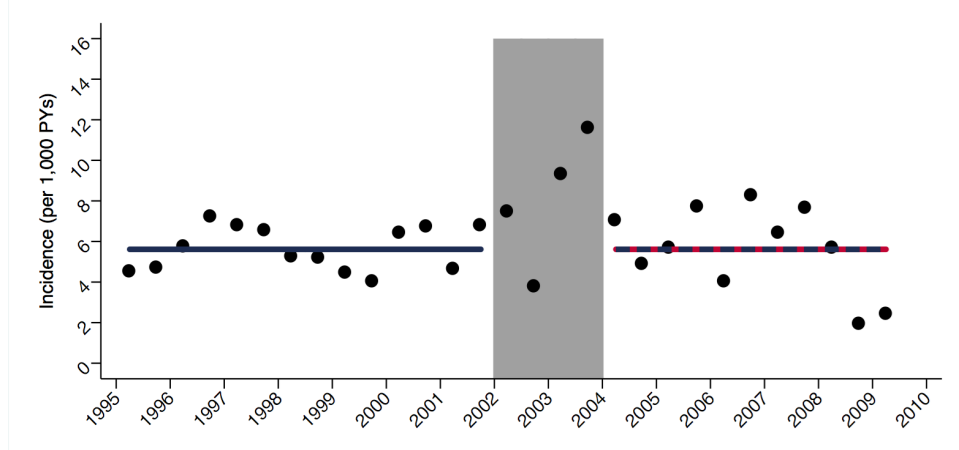

(B): Total Knee Replacement

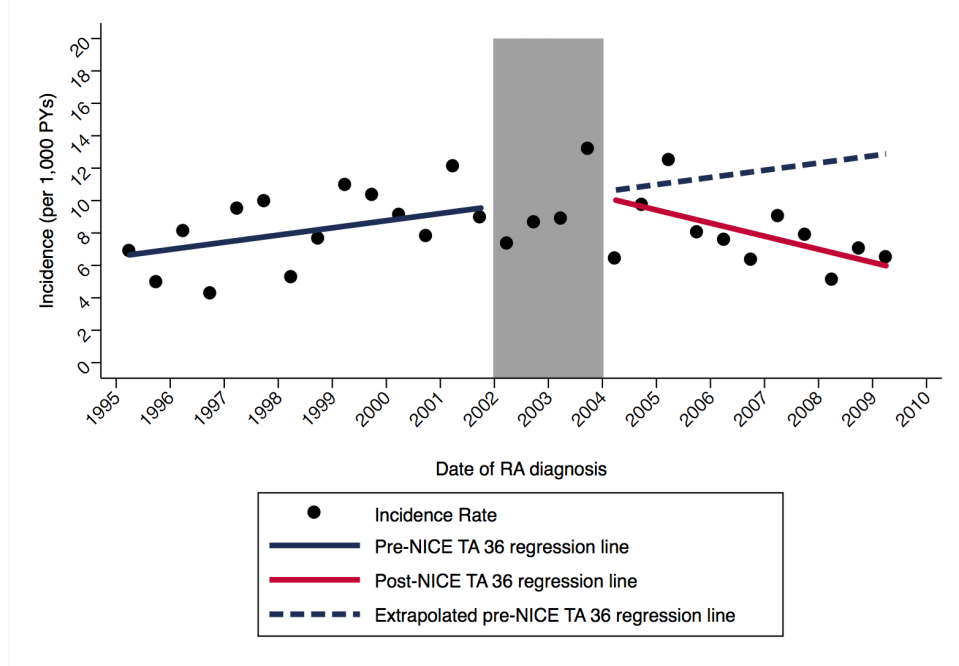

Supplementary Figure 2: Age and sex standardised incidence rates of joint replacement within 5 years of RA diagnosis (calculated at 6-monthly intervals) with 2-year lag post-NICE TA 36: (A) Total Hip Replacement and (B) Total Knee Replacement
