# Supplementary material
Source: PubMed Central journal article supplement (PMC5866918)
Supplement: NIHMS75534-supplement-Supplementary_figure_3.pdf [file NIHMS75534-supplement-Supplementary_figure_3.pdf]

Joinpoint analysis on TKR time-series

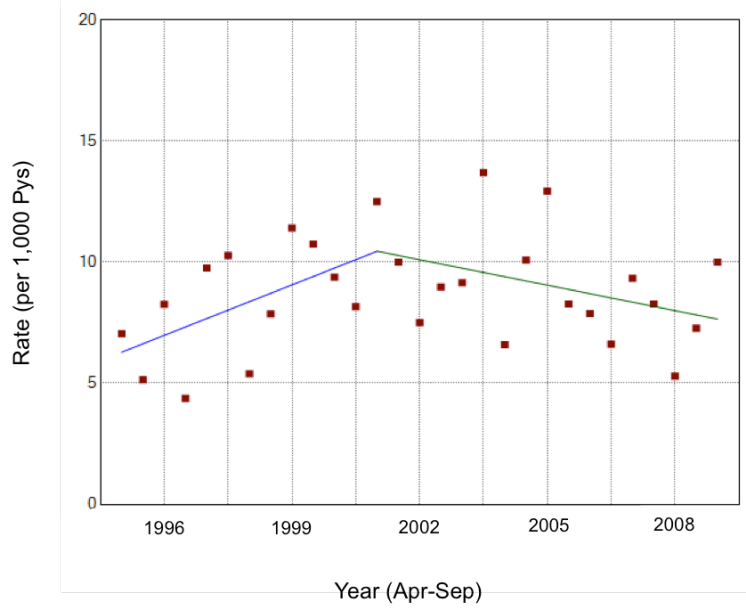

Joinpoint analysis on THR time-series

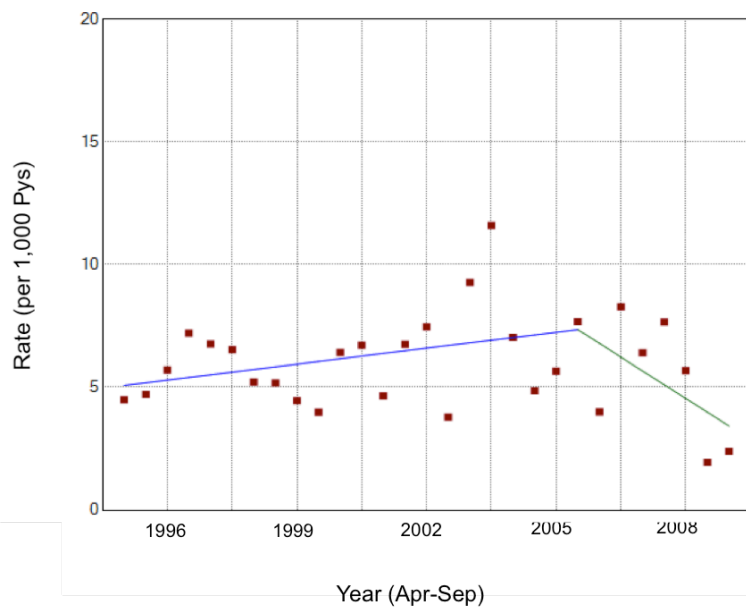

Supplementary Figure 3: graphical output of Joinpoint regression: (A) THR, (B) TKR
