# Supplementary material
Source: PubMed Central journal article supplement (PMC5866918)
Supplement: NIHMS75534-supplement-Supplementary_table_1.pdf [file NIHMS75534-supplement-Supplementary_table_1.pdf]

Supplementary Table 1: Read codes used to identify rheumatoid arthritis

| readcode | readterm                                                     |
|----------|--------------------------------------------------------------|
| N040.00  | Rheumatoid arthritis                                         |
| 14G1.00  | H/O: rheumatoid arthritis                                    |
| N040P00  | Seronegative rheumatoid arthritis                            |
| N040T00  | Flare of rheumatoid arthritis                                |
| N04X.00  | Seropositive rheumatoid arthritis, unspecified               |
| N042200  | Rheumatoid nodule                                            |
| N04..00  | Rheumatoid arthritis and other inflammatory polyarthropathy  |
| N047.00  | Seropositive erosive rheumatoid arthritis                    |
| N042000  | Rheumatic carditis                                           |
| 38DZ.00  | Disease activity score in rheumatoid arthritis               |
| N041.00  | Felty's syndrome                                             |
| N04y012  | Fibrosing alveolitis associated with rheumatoid arthritis    |
| N040S00  | Rheumatoid arthritis - multiple joint                        |
| N040N00  | Rheumatoid vasculitis                                        |
| N040D00  | Rheumatoid arthritis of knee                                 |
| 66HB000  | Rheumatoid arthritis annual review                           |
| N04y000  | Rheumatoid lung                                              |
| N040R00  | Rheumatoid nodule                                            |
| N040700  | Rheumatoid arthritis of wrist                                |
| N040800  | Rheumatoid arthritis of MCP joint                            |
| N040Q00  | Rheumatoid bursitis                                          |
| N040F00  | Rheumatoid arthritis of ankle                                |
| 38DZ000  | Disease activity score 28 joint in rheumatoid arthritis      |
| N040100  | Other rheumatoid arthritis of spine                          |
| N040900  | Rheumatoid arthritis of PIP joint of finger                  |
| N040K00  | Rheumatoid arthritis of 1st MTP joint                        |
| N042z00  | Rheumatoid arthropathy + visceral/systemic involvement NOS   |
| N040200  | Rheumatoid arthritis of shoulder                             |
| N040500  | Rheumatoid arthritis of elbow                                |
| N040B00  | Rheumatoid arthritis of hip                                  |
| N042100  | Rheumatoid lung disease                                      |
| N042.00  | Other rheumatoid arthropathy + visceral/systemic involvement |
| Nyu1G00  | [X]Seropositive rheumatoid arthritis, unspecified            |
| F396400  | Myopathy due to rheumatoid arthritis                         |
| F371200  | Polyneuropathy in rheumatoid arthritis                       |
| N040000  | Rheumatoid arthritis of cervical spine                       |
| Nyu1100  | [X]Other seropositive rheumatoid arthritis                   |
| N040A00  | Rheumatoid arthritis of DIP joint of finger                  |
| N04y011  | Caplan's syndrome                                            |
| N040H00  | Rheumatoid arthritis of talonavicular joint                  |
| Nyu1200  | [X]Other specified rheumatoid arthritis                      |
| 7P20300  | Delivery of rehabilitation for rheumatoid arthritis          |
| N040G00  | Rheumatoid arthritis of subtalar joint                       |
| N040400  | Rheumatoid arthritis of acromioclavicular joint              |
| N040C00  | Rheumatoid arthritis of sacro-iliac joint                    |
| N040J00  | Rheumatoid arthritis of other tarsal joint                   |
| N040600  | Rheumatoid arthritis of distal radio-ulnar joint             |
| N040L00  | Rheumatoid arthritis of lesser MTP joint                     |
| Nvu1000  | [X]Rheumatoid arthritis+involvement/other organs or systems  |
