# Supplementary material
Source: PubMed Central journal article supplement (PMC5866918)
Supplement: NIHMS75534-supplement-Supplementary_table_2.pdf [file NIHMS75534-supplement-Supplementary_table_2.pdf]

Supplementary Table 2: results of validation exercise of first total hip replacement (THR) and total knee replacement (TKR)\*

**(A) THR**

|             |          | <u>HES</u> |          |        |
|-------------|----------|------------|----------|--------|
|             |          | Positive   | Negative | Total  |
| <u>CPRD</u> | Positive | 382        | 168      | 550    |
|             | Negative | 95         | 10,307   | 10,402 |
|             | Total    | 477        | 10,475   | 10,952 |

Sensitivity = 80.1; Specificity = 98.4

**(A) TKR**

|             |          | <u>HES</u> |          |        |
|-------------|----------|------------|----------|--------|
|             |          | Positive   | Negative | Total  |
| <u>CPRD</u> | Positive | 525        | 194      | 719    |
|             | Negative | 104        | 10,129   | 10,233 |
|             | Total    | 629        | 10,323   | 10,952 |

Sensitivity = 83.5; Specificity = 98.1

\* agreement was defined as being present in both datasets within a period of 60 days. Sensitivity and Specificity were unchanged when 30 or 90 day periods were used.
