# Supplementary material
Source: PubMed Central journal article supplement (PMC5866918)
Supplement: NIHMS75534-supplement-Supplementary_table_3.pdf [file NIHMS75534-supplement-Supplementary_table_3.pdf]

Supplementary Table 3: Patient Characteristics at time of RA diagnosis: Stratified by Year

| Year ^  | Index RA diagnoses | age (mean, S.D.) | sex, female (%) | current smoking (%) | Obesity (%)  | Charlson Comorbidity Score (%) |              |               |             |
|---------|--------------------|------------------|-----------------|---------------------|--------------|--------------------------------|--------------|---------------|-------------|
|         |                    |                  |                 |                     |              | None (0)                       | Mild (1-2)   | Moerate (3-4) | Severe (≥5) |
| 1995    | 601                | 58.7 (14.7)      | 423 (70.4)      | 105 (27.9)          | 69 (11.5)    | 449 (74.7)                     | 104 (17.3)   | 37 (6.16)     | 11 (1.8)    |
| 1996    | 661                | 60.3 (14.9)      | 486 (73.5)      | 121 (30.7)          | 63 (9.5)     | 492 (74.4)                     | 103 (15.6)   | 59 (8.9)      | 7 (1.1)     |
| 1997    | 810                | 60.5 (14.9)      | 556 (68.6)      | 114 (25.3)          | 77 (9.5)     | 640 (79.0)                     | 100 (12.4)   | 58 (7.2)      | 12 (1.5)    |
| 1998    | 772                | 60.7 (15.5)      | 554 (71.8)      | 124 (29.2)          | 73 (9.5)     | 592 (76.7)                     | 117 (15.2)   | 52 (6.7)      | 11 (1.4)    |
| 1999    | 969                | 60.6 (14.9)      | 685 (70.7)      | 158 (30.1)          | 105 (10.8)   | 762 (78.6)                     | 131 (13.5)   | 62 (6.4)      | 14 (1.4)    |
| 2000    | 1,160              | 60.8 (14.9)      | 820 (70.7)      | 162 (29.4)          | 111 (9.6)    | 961 (82.8)                     | 125 (10.8)   | 60 (5.2)      | 14 (1.2)    |
| 2001    | 1,491              | 61.2 (14.9)      | 1,072 (71.9)    | 203 (29.0)          | 161 (10.8)   | 1,225 (82.2)                   | 183 (12.3)   | 63 (4.2)      | 20 (1.3)    |
| 2002    | 1,524              | 60.8 (14.7)      | 1,100 (72.2)    | 254 (31.1)          | 179 (11.8)   | 1,242 (81.5)                   | 170 (11.2)   | 99 (6.5)      | 13 (0.9)    |
| 2003    | 1,576              | 61.3 (15.1)      | 1,088 (69.0)    | 290 (28.5)          | 200 (12.7)   | 1,234 (78.3)                   | 190 (12.1)   | 123 (7.8)     | 29 (1.8)    |
| 2004    | 1,634              | 61.5 (14.9)      | 1,189 (72.8)    | 331 (25.9)          | 257 (15.7)   | 1,283 (78.5)                   | 189 (11.6)   | 122 (7.5)     | 40 (2.5)    |
| 2005    | 1,478              | 61.0 (15.2)      | 1,060 (71.7)    | 331 (25.9)          | 259 (17.5)   | 1,108 (75.0)                   | 180 (12.2)   | 142 (9.6)     | 48 (3.3)    |
| 2006    | 1,432              | 60.3 (15.4)      | 1,047 (73.1)    | 305 (26.3)          | 284 (19.8)   | 1,054 (73.6)                   | 148 (10.3)   | 171 (12.0)    | 59 (4.1)    |
| 2007    | 1,369              | 59.9 (14.8)      | 968 (70.7)      | 294 (22.9)          | 314 (22.9)   | 959 (70.1)                     | 134 (9.8)    | 209 (15.3)    | 67 (4.9)    |
| 2008    | 1,367              | 59.4 (15.0)      | 927 (67.8)      | 316 (24.2)          | 326 (23.9)   | 978 (71.5)                     | 153 (11.2)   | 163 (11.9)    | 73 (5.3)    |
| 2009*   | 661                | 60.3 (15.7)      | 438 (66.3)      | 136 (20.9)          | 146 (22.1)   | 477 (72.2)                     | 63 (9.5)     | 90 (13.6)     | 31 (4.7)    |
| Overall | 17,505             | 60.6 (15.0)      | 12,412 (70.9)   | 3,244 (26.3%)       | 4,264 (17.9) | 13,456 (76.9)                  | 2,090 (11.9) | 1,510 (8.6)   | 449 (2.6)   |

^ Apr to Mar

\* Only data Apr to Sept available/included
