# Supplementary material
Source: PubMed Central journal article supplement (PMC5866918)
Supplement: NIHMS75534-supplement-Supplementary_table_4.pdf [file NIHMS75534-supplement-Supplementary_table_4.pdf]

Supplementary Table 4: Temporal Trends in Joint Replacement Rates Among 17,505 Incident Rheumatoid Arthritis Patients Diagnosed From 1995 to 2009 (per 1,000 Person-Years). Results from 'full' models (no variable selection)

| <u>Parameter</u>              | <u>Coefficient</u> | <u>Lower 95% C.I.</u> | <u>Upper 95% C.I.</u> | <u>p value</u> |
|-------------------------------|--------------------|-----------------------|-----------------------|----------------|
| <b>Total Hip Replacement</b>  | -                  | -                     | -                     | -              |
| Intercept                     | 5.43               | 3.48                  | 7.37                  | <0.001         |
| Trend <sup>1</sup>            | 0.03               | -0.20                 | 0.25                  | 0.811          |
| Level change after NICE TA 36 | 3.74               | 0.79                  | 6.69                  | 0.015          |
| Trend change after NICE TA 36 | -0.49              | -0.83                 | -0.15                 | 0.007          |
| <b>Total Hip Replacement</b>  |                    |                       |                       |                |
| Intercept                     | 5.83               | 3.50                  | 8.16                  | <0.001         |
| Trend <sup>1</sup>            | 0.32               | 0.05                  | 0.60                  | 0.023          |
| Level change after NICE TA 36 | -0.20              | -3.74                 | 3.34                  | 0.907          |
| Trend change after NICE TA 36 | -0.68              | -1.09                 | -0.27                 | 0.002          |

<sup>1</sup> per 6 months
