# Supplementary material
Source: PubMed Central journal article supplement (PMC5866918)

Supplementary Figure 1: Population Flow Diagram

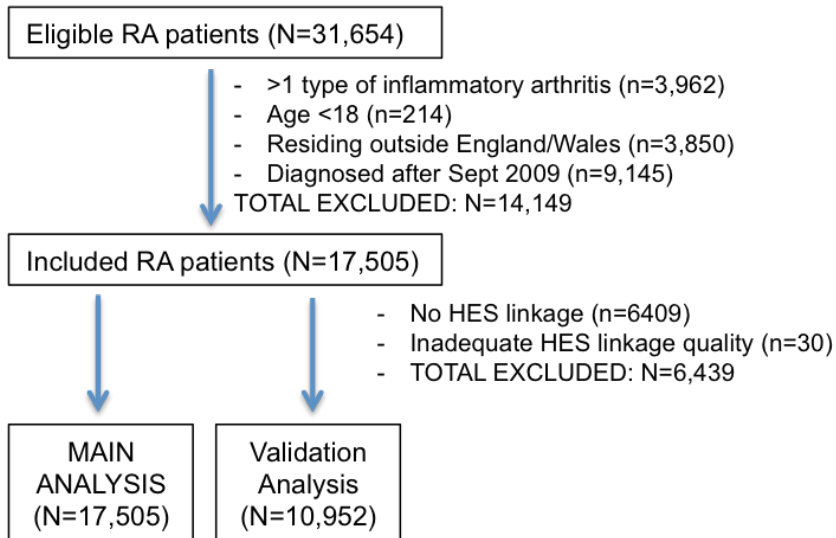

Supplement: NIHMS75534-supplement-Supplementary_figure_1_.pdf [file NIHMS75534-supplement-Supplementary_figure_1_.pdf]
